# Supplementary material for: Biocide Exposure Induces Changes in Susceptibility, Pathogenicity, and Biofilm Formation in Uropathogenic Escherichia coli
Source: PubMed Central journal article supplement (PMC6395906; doi:10.1128/aac.01892-18), 2019-02-26
Supplement: AAC.01892-18-s0001.pdf [file AAC.01892-18-s0001.pdf]

Table S1: Average fold-change in biocide susceptibility for UPEC after repeated biocide exposure.

| Isolate | MIC         |               |          |                | MBC        |           |          |                | MBEC        |               |            |                |
|---------|-------------|---------------|----------|----------------|------------|-----------|----------|----------------|-------------|---------------|------------|----------------|
|         | PHMB        | Triclosan     | BAC      | Silver nitrate | PHMB       | Triclosan | BAC      | Silver nitrate | PHMB        | Triclosan     | BAC        | Silver nitrate |
| EC1     | <b>0.5</b>  | <b>97.7</b>   | 1        | <b>2</b>       | 0.7        | 1         | <b>2</b> | <b>2</b>       | <b>21.3</b> | <b>62.6</b>   | <b>2</b>   | 1              |
| EC2     | 1           | <b>312.5</b>  | <b>2</b> | <b>2</b>       | <b>0.5</b> | <b>4</b>  | <b>2</b> | <b>2</b>       | <b>21.3</b> | <b>125</b>    | <b>8</b>   | 1              |
| EC11    | 1           | <b>39.1</b>   | <b>2</b> | <b>2</b>       | 1          | 1         | <b>2</b> | <b>2</b>       | <b>32</b>   | <b>2083.3</b> | <b>9.1</b> | <b>54.8</b>    |
| EC26    | <b>0.5</b>  | <b>4166.7</b> | <b>2</b> | <b>2</b>       | 1          | <b>16</b> | <b>2</b> | <b>2</b>       | <b>6.4</b>  | <b>2500</b>   | <b>2.7</b> | 1              |
| EC28    | 1           | <b>19.5</b>   | 1        | <b>2</b>       | 1          | 1         | 0.8      | <b>2</b>       | <b>32</b>   | <b>16</b>     | 1          | 1.1            |
| EC34    | 1           | <b>781.3</b>  | 1        | <b>2</b>       | 0.7        | <b>8</b>  | 1        | <b>2</b>       | <b>64</b>   | <b>1250</b>   | <b>5.3</b> | 1.7            |
| EC958   | <b>0.25</b> | <b>260</b>    | <b>2</b> | <b>2</b>       | 0.9        | <b>8</b>  | 1        | <b>16</b>      | <b>42.5</b> | <b>125</b>    | <b>4</b>   | 1.3            |
| CFT073  | <b>0.25</b> | <b>780</b>    | 1        | <b>2</b>       | 0.9        | <b>4</b>  | 1        | <b>2</b>       | <b>14.2</b> | <b>500</b>    | <b>4</b>   | <b>0.3</b>     |

Fold changes are indicated for MIC, MBC, and MBEC in UPEC isolates after long-term biocide exposure compared with the respective isolate passaged in a biocide free-environment (C12). Changes ( $\geq 2$  fold-change) are shown in bold.

Figure S1: Planktonic growth in UPEC isolates

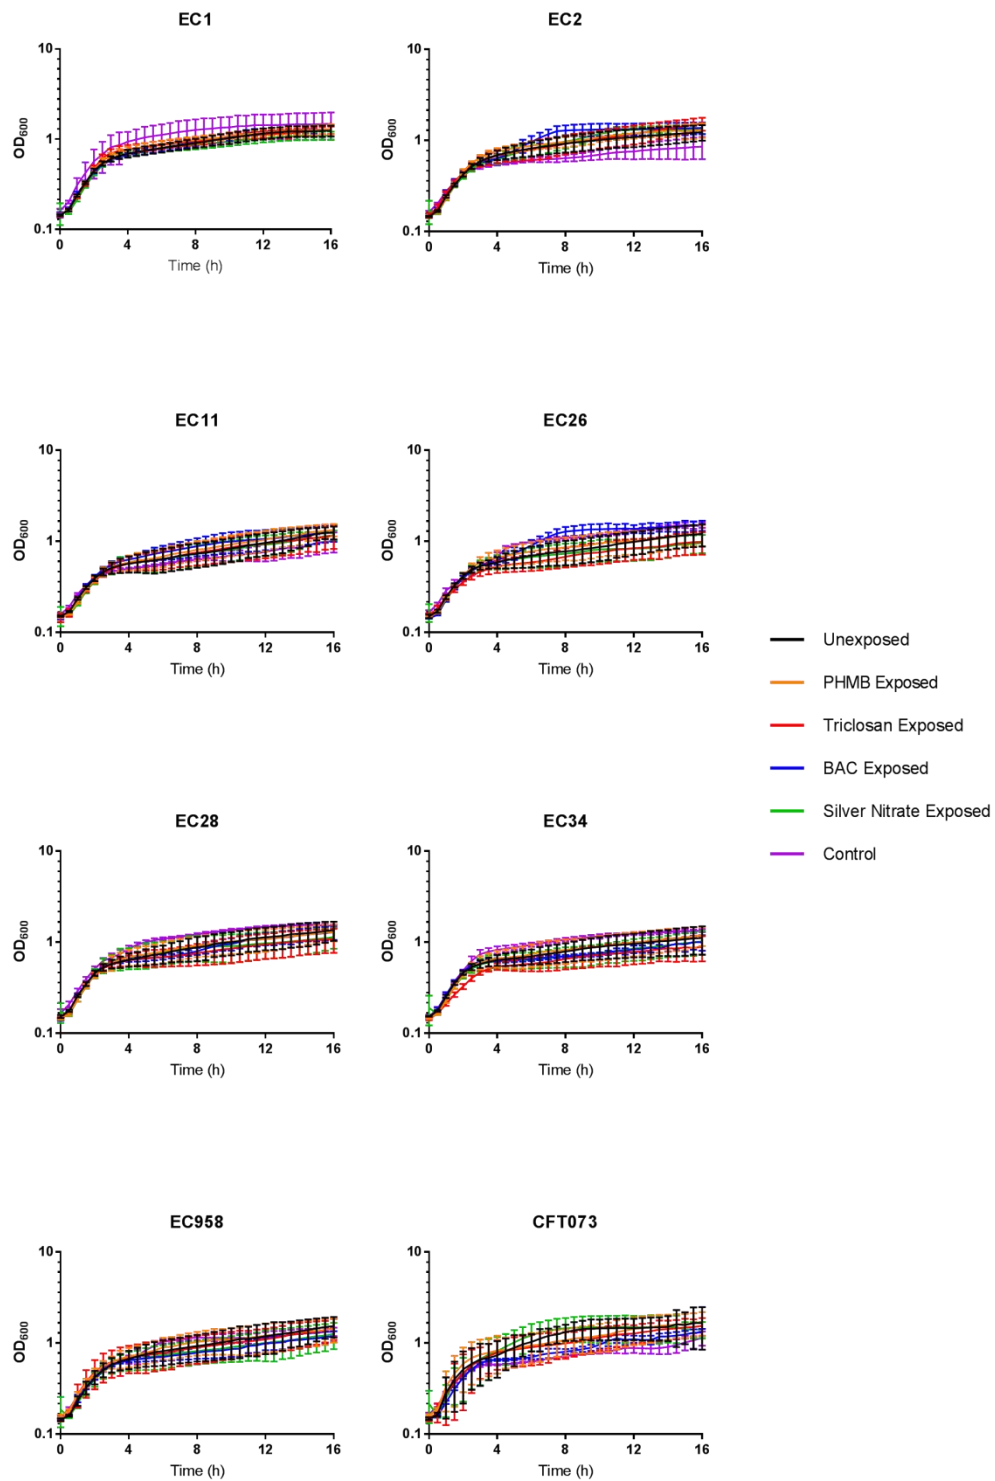

Figure S1: Planktonic growth for eight UPEC isolates after exposure to four biocides. Control isolates repeatedly passaged without biocide (C12) are also shown.
